# Supplementary material for: Bis(di-2-pyridyl-methanediol)copper(ii) dihydrogentrifluoride: a structural and spectroscopic study of the H2F3– anion in a complex salt
Source: Royal Society of Chemistry journal article supplement (doi:10.1039/b713598j), 2007-01-01

**Supplementary information:**

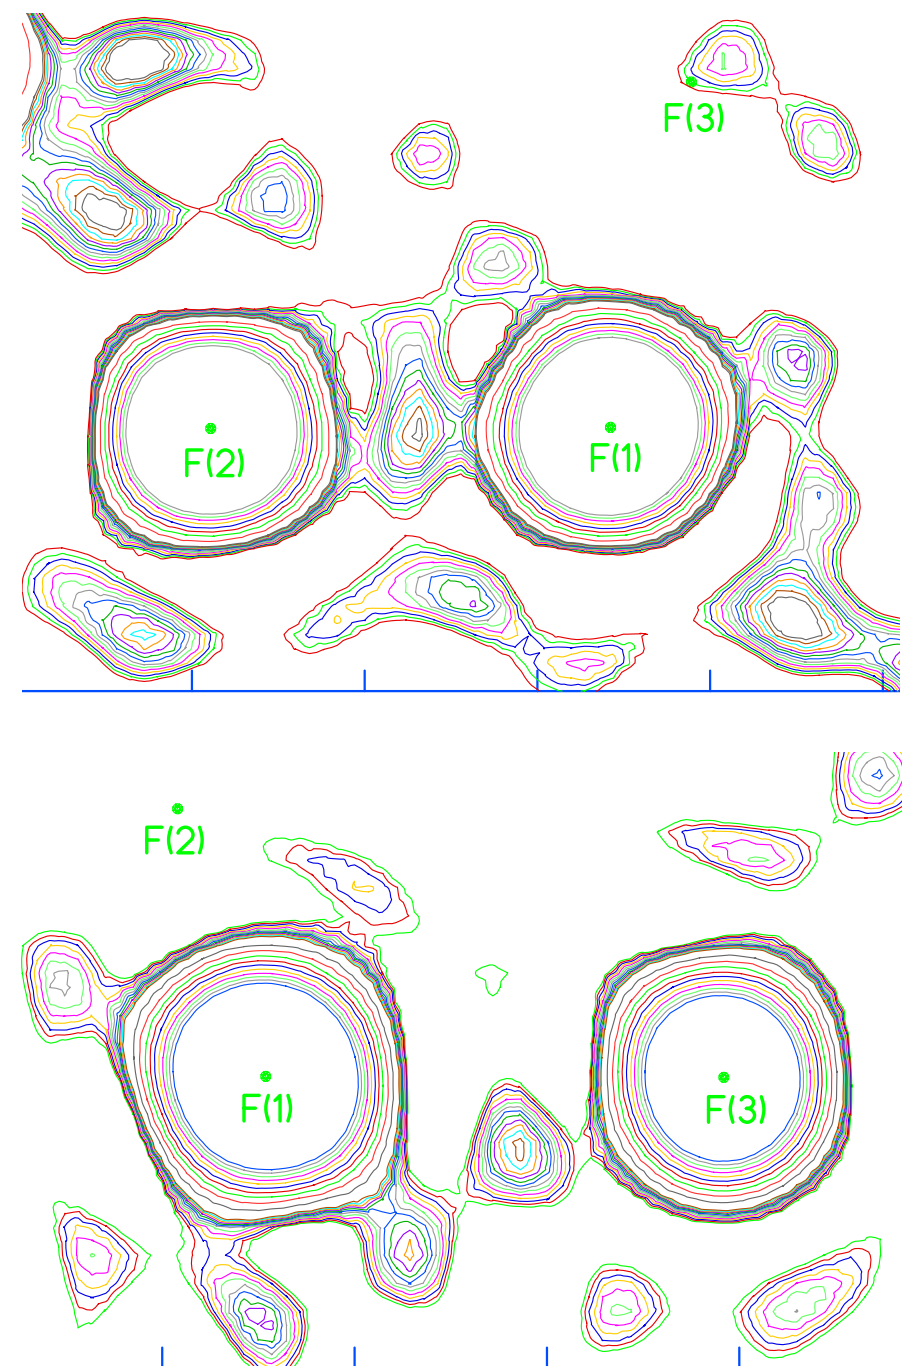

Residual electron density maps for (top) the  $\text{F}(1)\cdots\text{F}(2)$  and (bottom)  $\text{F}(1)\cdots\text{F}(3)$  segments of the  $\text{H}_2\text{F}_3^-$  anion in  $[\text{Cu}(\text{dpd})_2][\text{H}_2\text{F}_3]_2$ . Hash marks on the horizontal axis are 1-Å increments.

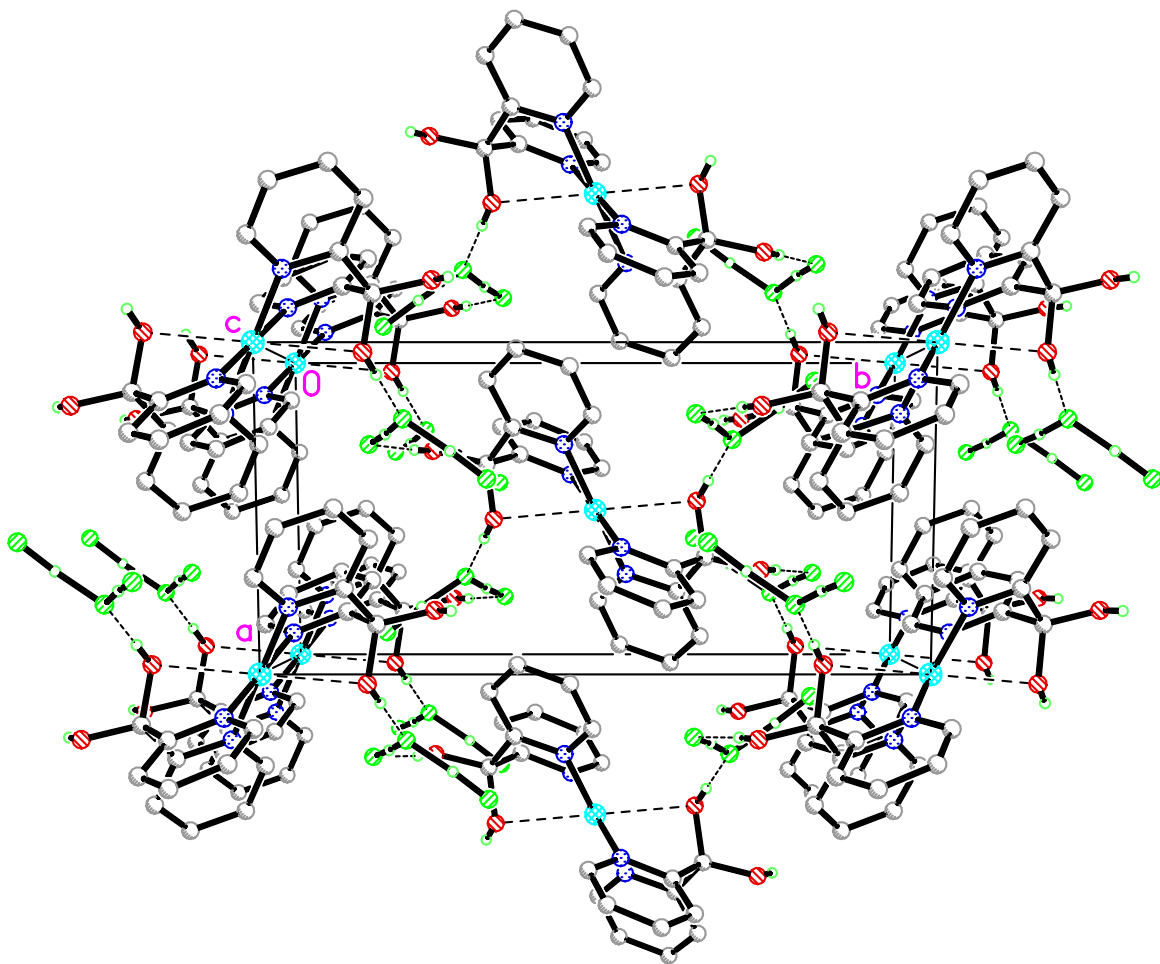

Crystal packing diagram for [Cu(dpdp)<sub>2</sub>][H<sub>2</sub>F<sub>3</sub>]<sub>2</sub> viewed along the crystallographic *c*-axis.

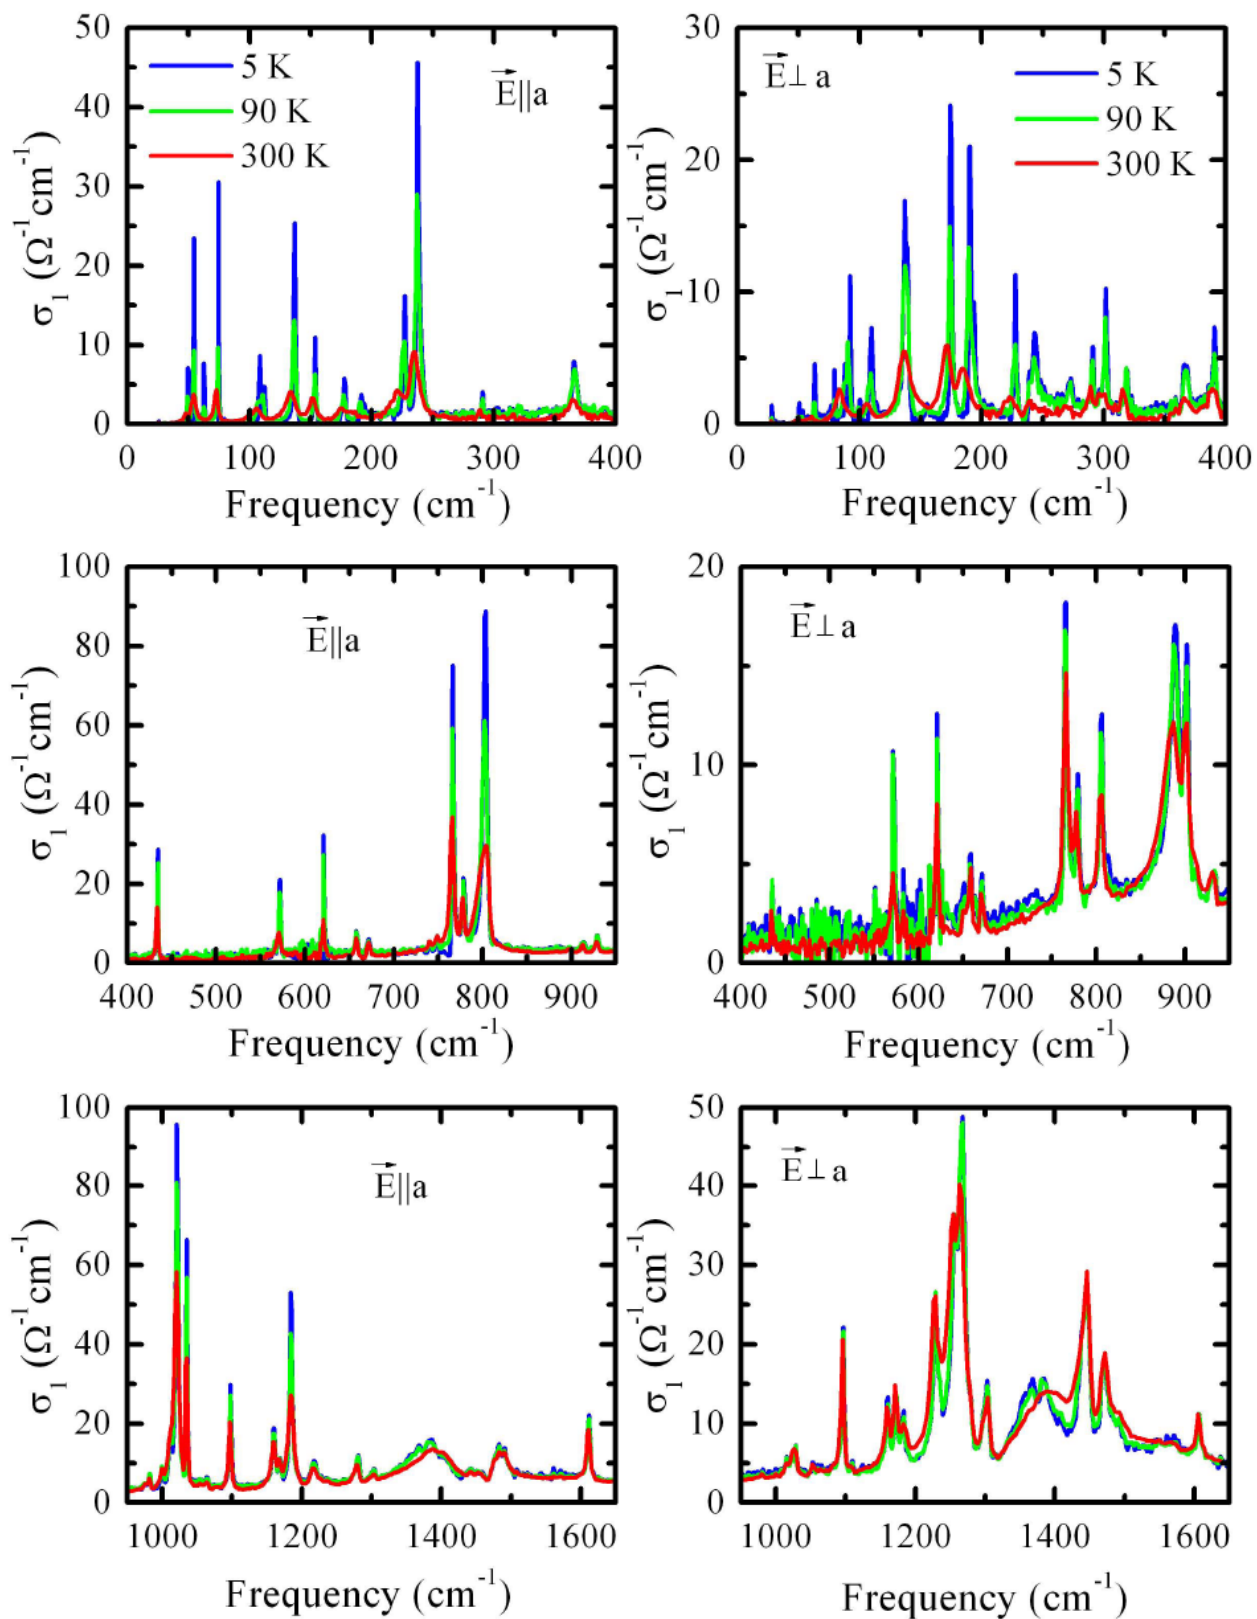

Temperature-dependent and polarized infrared spectra for  $[\text{Cu}(\text{dpd})_2][\text{H}_2\text{F}_3]_2$ .

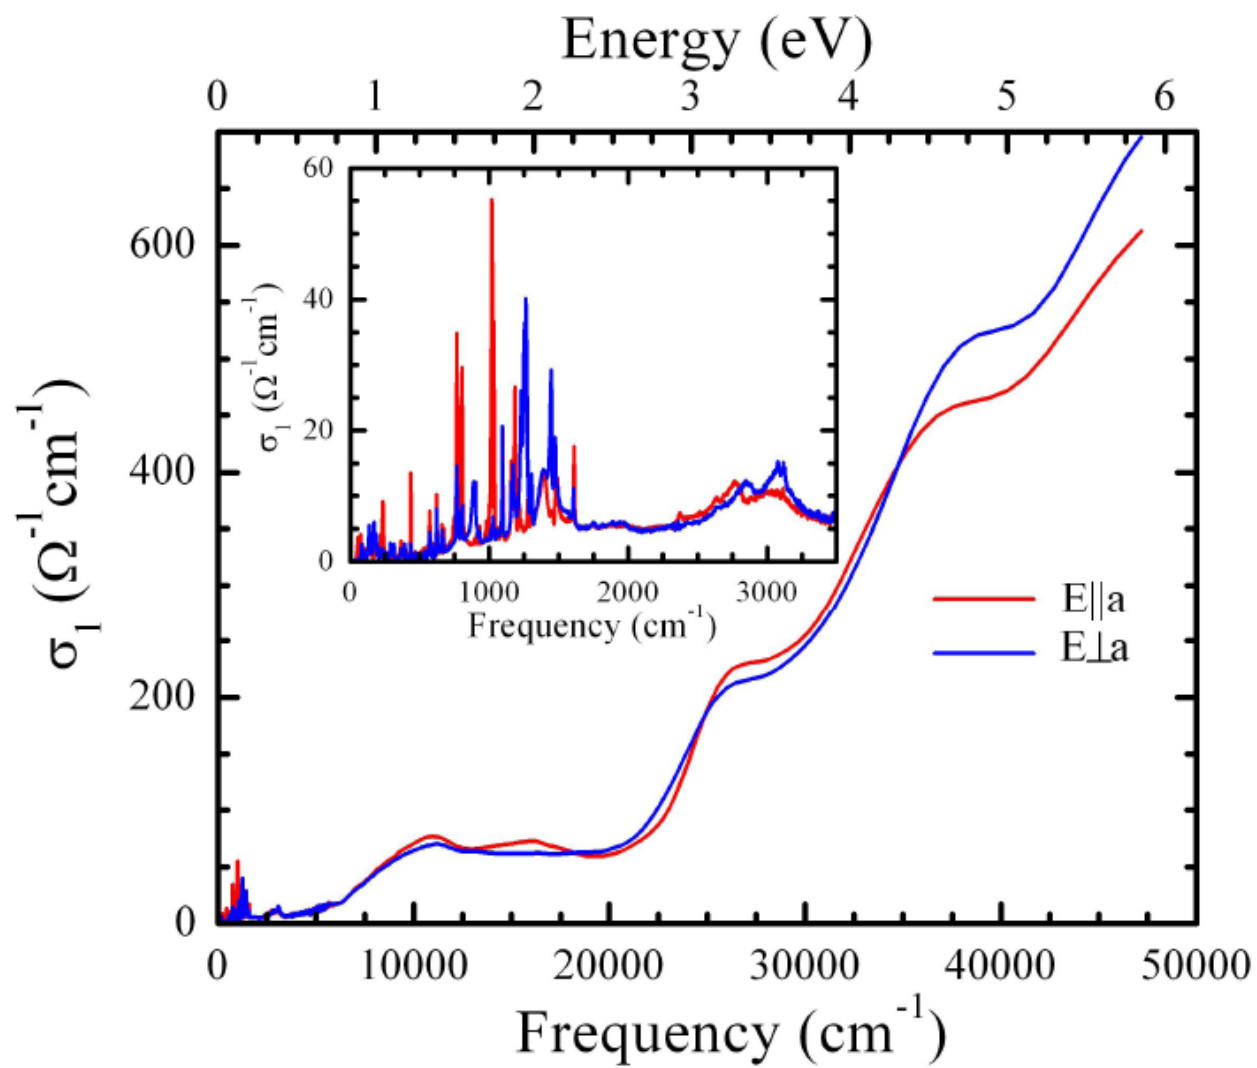

Supplement: b713598j.pdf [file b713598j.pdf]
